# Supplementary material for: USP9X controls translation efficiency via deubiquitination of eukaryotic translation initiation factor 4A1
Source: PubMed Central journal article supplement — Nucleic Acids Res. 2017 Dec 8;46(2):823–39. doi: 10.1093/nar/gkx1226 (PMC5778534; doi:10.1093/nar/gkx1226), 2017-12-08
Supplement: gkx1226_supp.pdf [file gkx1226_supp.pdf]

## Supplemental Figure S1

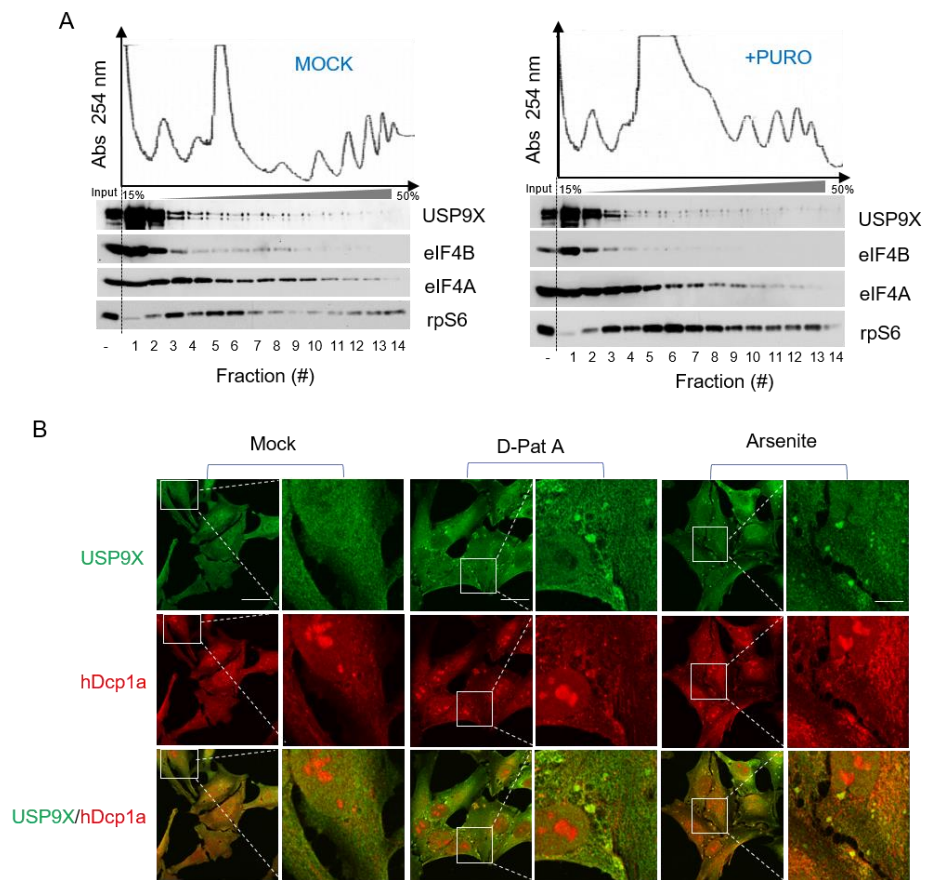

(A) Co-sedimentation of USP9X with eIF4B and eIF4A with or without puromycin treatment. Approximately  $7 \times 10^6$  of HEK293T cells were treated with or without  $10 \mu\text{M}$  puromycin for 30 min, harvested, centrifuged over a 15%-50% sucrose gradient and analyzed using a continuous 254-nm monitoring system. The fractions were collected and TCA precipitated. Proteins that precipitated from fractions were analysed using Western blotting with the indicated antibodies. (B) Immunofluorescence staining of USP9X and hDcp1a in HeLa cells treated with either  $0.1 \mu\text{M}$  D-PatA or  $0.3 \text{ mM}$  sodium arsenite for 1.5 h. USP9X did not completely colocalized with the P-bodies marker hDcp1a.

## Supplemental Figure S2

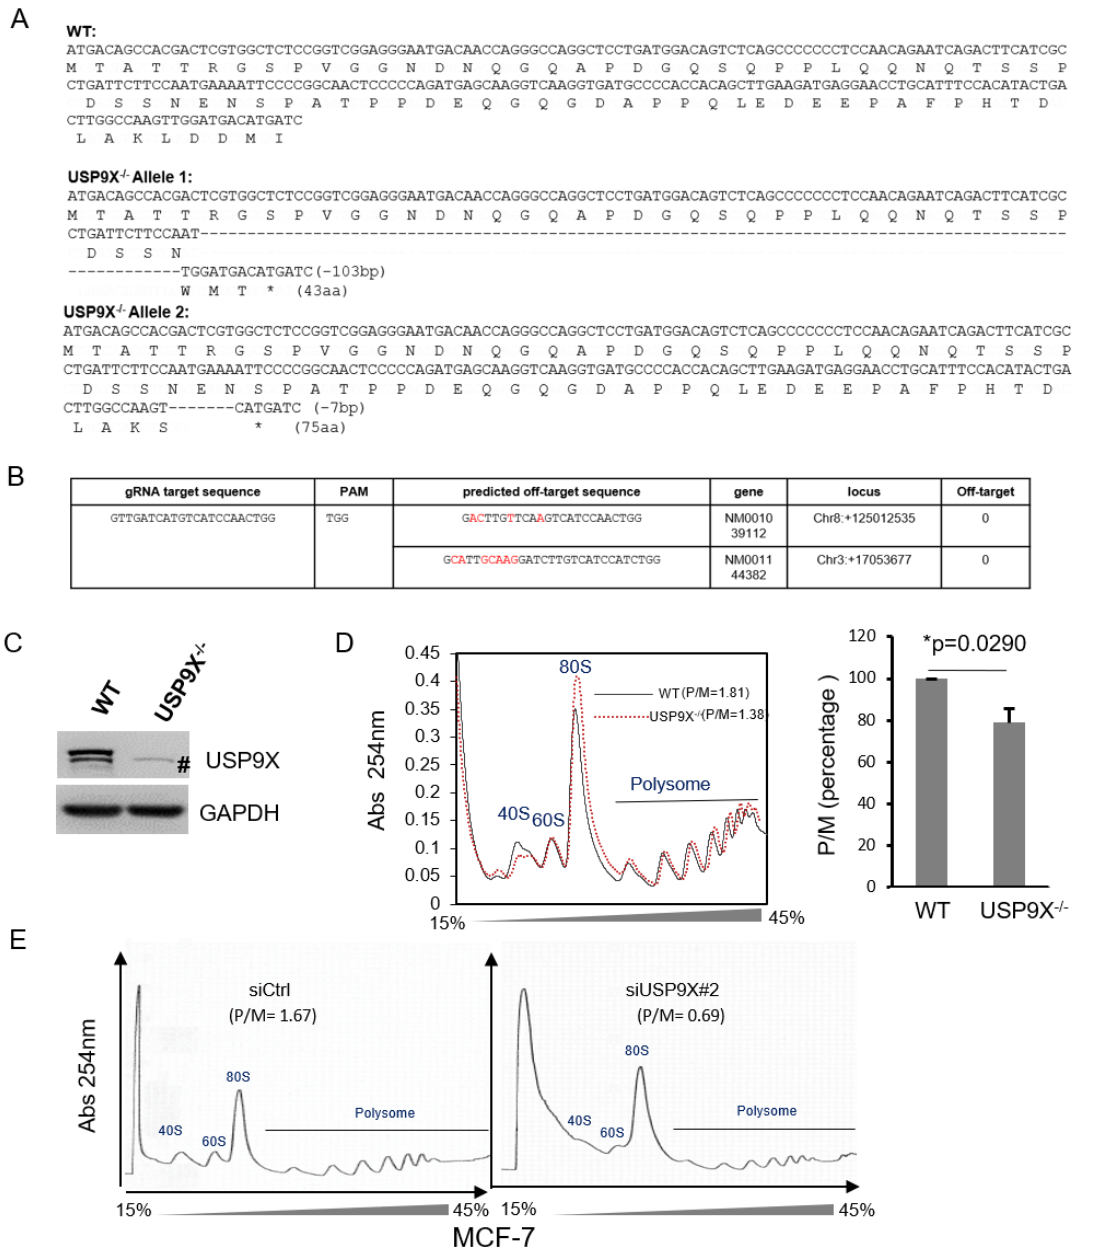

(A) Sequences of the modified USP9X gene in the human HEK293T WT and USP9X<sup>-/-</sup> (Clone 14) cells. The PCR products were analyzed using DNA sequencing. (B) Mutation frequency analysis at the predicted off-target sites. The off-target sites were predicted and aligned with the human genome. The off-target sequences in red indicate

bases that differ from the on-target sites. (C) Expression analysis of USP9X and GAPDH (as loading control) in HEK293T wildtype (WT) and USP9X knock-out (USP9X<sup>-/-</sup>) cells. (#) indicated a cross-reacting band. (D) Representative polyribosome profiles analysis and corresponding P/M ratio of HEK293T WT and USP9X<sup>-/-</sup> cells, by using methods described in “Materials and Methods”. \*P =0.029 (n=3) for the USP9X<sup>-/-</sup> cells compared with WT HEK293T cells. (E) Representative polyribosome profiles analysis and corresponding P/M ratio of MCF-7 cells treated with either targeted siRNA or control siRNA, by using methods described in “Materials and Methods”.

## Supplemental Table S1 : Specific proteins identified in eIF4B affinity purification

**NOTE:** "prot\_acc": uniprot database unique identifier; "prot\_desc": uniprot database protein description ; "prot\_score": protein score by mascot software;"prot\_matches": numbers of assigned peptide matches ;"prot\_mass":protein mass ;"emPAI": Estimation of Absolute Protein Amount in Proteomics by the Number of Sequenced Peptides per Protein

### eIF4BIP\_B1

| prot_acc | prot_desc                                                                               | prot_score | prot_mass | prot_matches | emPAI |
|----------|-----------------------------------------------------------------------------------------|------------|-----------|--------------|-------|
| Q93008   | Probable ubiquitin carboxyl-terminal hydrolase FAF-X OS=Homo sapiens GN=USP9X PE=1 SV=3 | 53         | 292094    | 1            | 0.01  |
| B4DS13   | Eukaryotic translation initiation factor 4B OS=Homo sapiens GN=EIF4B PE=2 SV=1          | 48         | 64767     | 2            | 0.1   |
| Q9Y238-2 | Isoform 2 of Deleted in lung and esophageal cancer protein 1 OS=Homo sapiens GN=DLEC1   | 40         | 102838    | 1            | 0.03  |
| Q92914   | Fibroblast growth factor 11 OS=Homo sapiens GN=FGF11 PE=2 SV=1                          | 31         | 24989     | 1            | 0.13  |

### eIF4BIP\_B2

| prot_acc | prot_desc                                                                                    | prot_score | prot_mass | prot_matches | emPAI |
|----------|----------------------------------------------------------------------------------------------|------------|-----------|--------------|-------|
| Q14152   | Eukaryotic translation initiation factor 3 subunit A OS=Homo sapiens GN=EIF3A PE=1 SV=1      | 147        | 166468    | 7            | 0.1   |
| Q93008-1 | Isoform 2 of Probable ubiquitin carboxyl-terminal hydrolase FAF-X OS=Homo sapiens GN=USP9X   | 82         | 290278    | 3            | 0.03  |
| Q86SJ6   | Desmoglein-4 OS=Homo sapiens GN=DSG4 PE=1 SV=1                                               | 72         | 113751    | 1            | 0.03  |
| P62805   | Histone H4 OS=Homo sapiens GN=HIST1H4A PE=1 SV=2                                             | 63         | 11360     | 1            | 0.29  |
| H0YEX4   | Cell adhesion molecule-related/down-regulated by oncogenes (Fragment) OS=Homo sapiens GN=CDO | 45         | 69697     | 1            | 0.04  |

### eIF4BIP\_B3

| prot_acc | prot_desc                                                                                          | prot_score | prot_mass | prot_matches | emPAI |
|----------|----------------------------------------------------------------------------------------------------|------------|-----------|--------------|-------|
| Q14152   | Eukaryotic translation initiation factor 3 subunit A OS=Homo sapiens GN=EIF3A PE=1 SV=1            | 238        | 166468    | 21           | 0.25  |
| Q93008   | Probable ubiquitin carboxyl-terminal hydrolase FAF-X OS=Homo sapiens GN=USP9X PE=1 SV=3            | 115        | 292094    | 4            | 0.03  |
| H3BRV0   | Eukaryotic translation initiation factor 3 subunit C OS=Homo sapiens GN=EIF3C PE=2 SV=1            | 109        | 104036    | 4            | 0.09  |
| C9JQN7   | Eukaryotic translation initiation factor 3 subunit B (Fragment) OS=Homo sapiens GN=EIF3B PE=2 SV=1 | 67         | 18066     | 1            | 0.18  |
| B4DS13   | Eukaryotic translation initiation factor 4B OS=Homo sapiens GN=EIF4B PE=2 SV=1                     | 60         | 64767     | 3            | 0.15  |
| Q00839   | Heterogeneous nuclear ribonucleoprotein U OS=Homo sapiens GN=HNRNPU PE=1 SV=6                      | 56         | 90528     | 2            | 0.03  |
| O00507   | Probable ubiquitin carboxyl-terminal hydrolase FAF-Y OS=Homo sapiens GN=USP9Y PE=1 SV=2            | 52         | 290891    | 1            | 0.01  |
| Q8TBJ5   | Fez family zinc finger protein 2 OS=Homo sapiens GN=FEZF2 PE=2 SV=2                                | 42         | 48780     | 1            | 0.06  |

### eIF4BIP\_B4

| prot_acc | prot_desc                                                                               | prot_score | prot_mass | prot_matches | emPAI |
|----------|-----------------------------------------------------------------------------------------|------------|-----------|--------------|-------|
| Q14152   | Eukaryotic translation initiation factor 3 subunit A OS=Homo sapiens GN=EIF3A PE=1 SV=1 | 262        | 166468    | 13           | 0.18  |
| E7EX17   | Eukaryotic translation initiation factor 4B OS=Homo sapiens GN=EIF4B PE=2 SV=1          | 239        | 69657     | 15           | 0.62  |
| H3BRV0   | Eukaryotic translation initiation factor 3 subunit C OS=Homo sapiens GN=EIF3C PE=2 SV=1 | 148        | 104036    | 5            | 0.09  |
| P55884   | Eukaryotic translation initiation factor 3 subunit B OS=Homo sapiens GN=EIF3B PE=1 SV=3 | 142        | 92424     | 4            | 0.14  |
| Q00839   | Heterogeneous nuclear ribonucleoprotein U OS=Homo sapiens GN=HNRNPU PE=1 SV=6           | 67         | 90528     | 1            | 0.03  |
| Q93008   | Probable ubiquitin carboxyl-terminal hydrolase FAF-X OS=Homo sapiens GN=USP9X PE=1 SV=3 | 63         | 292094    | 2            | 0.01  |
| Q92499   | ATP-dependent RNA helicase DDX1 OS=Homo sapiens GN=DDX1 PE=1 SV=2                       | 53         | 82380     | 1            | 0.04  |

### eIF4BIP\_B5

| prot_acc | prot_desc                                                                                  | prot_score | prot_mass | prot_matches | emPAI |
|----------|--------------------------------------------------------------------------------------------|------------|-----------|--------------|-------|
| Q14152   | Eukaryotic translation initiation factor 3 subunit A OS=Homo sapiens GN=EIF3A PE=1 SV=1    | 386        | 166468    | 24           | 0.27  |
| H3BRV0   | Eukaryotic translation initiation factor 3 subunit C OS=Homo sapiens GN=EIF3C PE=2 SV=1    | 371        | 104036    | 13           | 0.47  |
| Q93008-1 | Isoform 2 of Probable ubiquitin carboxyl-terminal hydrolase FAF-X OS=Homo sapiens GN=USP9X | 200        | 290278    | 10           | 0.08  |
| O00571   | ATP-dependent RNA helicase DDX3X OS=Homo sapiens GN=DDX3X PE=1 SV=3                        | 188        | 73198     | 7            | 0.34  |
| B4DS13   | Eukaryotic translation initiation factor 4B OS=Homo sapiens GN=EIF4B PE=2 SV=1             | 163        | 64767     | 10           | 0.46  |
| P55884   | Eukaryotic translation initiation factor 3 subunit B OS=Homo sapiens GN=EIF3B PE=1 SV=3    | 159        | 92424     | 7            | 0.18  |
| P11142-2 | Isoform 2 of Heat shock cognate 71 kDa protein OS=Homo sapiens GN=HSPA8                    | 150        | 53484     | 5            | 0.33  |
| O00507   | Probable ubiquitin carboxyl-terminal hydrolase FAF-Y OS=Homo sapiens GN=USP9Y PE=1 SV=2    | 125        | 290891    | 7            | 0.04  |
| P17066   | Heat shock 70 kDa protein 6 OS=Homo sapiens GN=HSPA6 PE=1 SV=2                             | 109        | 70984     | 3            | 0.14  |
| P08107   | Heat shock 70 kDa protein 1A/1B OS=Homo sapiens GN=HSPA1A PE=1 SV=5                        | 99         | 70009     | 3            | 0.09  |
| E7ERJ7   | Polyadenylate-binding protein 1 OS=Homo sapiens GN=PABPC1 PE=2 SV=1                        | 92         | 67096     | 4            | 0.15  |
| Q5R118   | Heterogeneous nuclear ribonucleoprotein U (Fragment) OS=Homo sapiens GN=HNRNPU PE=2 SV=1   | 41         | 27387     | 1            | 0.12  |

**eIF4BIP\_B6**

| prot_acc | prot_desc                                                                                          | prot_score | prot_mass | prot_matches | emPAI |
|----------|----------------------------------------------------------------------------------------------------|------------|-----------|--------------|-------|
| Q14152   | Eukaryotic translation initiation factor 3 subunit A OS=Homo sapiens GN=EIF3A PE=1 SV=1            | 334        | 166468    | 16           | 0.18  |
| J3KN35   | Eukaryotic translation initiation factor 3 subunit L OS=Homo sapiens GN=EIF3L PE=4 SV=1            | 231        | 62653     | 12           | 0.55  |
| P55884   | Eukaryotic translation initiation factor 3 subunit B OS=Homo sapiens GN=EIF3B PE=1 SV=3            | 179        | 92424     | 8            | 0.26  |
| B4DS13   | Eukaryotic translation initiation factor 4B OS=Homo sapiens GN=EIF4B PE=2 SV=1                     | 161        | 64767     | 9            | 0.46  |
| H3BRV0   | Eukaryotic translation initiation factor 3 subunit C OS=Homo sapiens GN=EIF3C PE=2 SV=1            | 135        | 104036    | 4            | 0.13  |
| B0QYA3   | Eukaryotic translation initiation factor 3 subunit D (Fragment) OS=Homo sapiens GN=EIF3D PE=2 SV=1 | 106        | 19769     | 1            | 0.16  |
| B4DT23   | Protein FAM98A OS=Homo sapiens GN=FAM98A PE=2 SV=1                                                 | 103        | 34066     | 1            | 0.09  |
| P08107   | Heat shock 70 kDa protein 1A/1B OS=Homo sapiens GN=HSPA1A PE=1 SV=5                                | 81         | 70009     | 2            | 0.09  |
| E9PN89   | Heat shock cognate 71 kDa protein (Fragment) OS=Homo sapiens GN=HSPA8 PE=2 SV=1                    | 76         | 34797     | 3            | 0.19  |
| Q93008-1 | Isoform 2 of Probable ubiquitin carboxyl-terminal hydrolase FAF-X OS=Homo sapiens GN=USP9X         | 76         | 290278    | 5            | 0.04  |
| B4DXX7   | ATP-dependent RNA helicase DDX3Y OS=Homo sapiens GN=DDX3Y PE=2 SV=1                                | 52         | 72886     | 1            | 0.04  |

**eIF4BIP\_B7**

| prot_acc | prot_desc                                                                               | prot_score | prot_mass | prot_matches | emPAI |
|----------|-----------------------------------------------------------------------------------------|------------|-----------|--------------|-------|
| Q93008   | Probable ubiquitin carboxyl-terminal hydrolase FAF-X OS=Homo sapiens GN=USP9X PE=1 SV=3 | 127        | 292094    | 2            | 0.02  |
| H3BRV0   | Eukaryotic translation initiation factor 3 subunit C OS=Homo sapiens GN=EIF3C PE=2 SV=1 | 114        | 104036    | 2            | 0.06  |
| P55884   | Eukaryotic translation initiation factor 3 subunit B OS=Homo sapiens GN=EIF3B PE=1 SV=3 | 74         | 92424     | 2            | 0.07  |
| O00507   | Probable ubiquitin carboxyl-terminal hydrolase FAF-Y OS=Homo sapiens GN=USP9Y PE=1 SV=2 | 60         | 290891    | 1            | 0.01  |
| B4DS13   | Eukaryotic translation initiation factor 4B OS=Homo sapiens GN=EIF4B PE=2 SV=1          | 54         | 64767     | 8            | 0.21  |
| C9JQK2   | Ankyrin repeat domain-containing protein 53 OS=Homo sapiens GN=ANKRD53 PE=2 SV=1        | 40         | 28634     | 1            | 0.11  |
| Q96JT2   | Solute carrier family 45 member 3 OS=Homo sapiens GN=SLC45A3 PE=2 SV=1                  | 34         | 59284     | 1            | 0.05  |
| B3KSH1   | Eukaryotic translation initiation factor 3 subunit F OS=Homo sapiens GN=EIF3F PE=2 SV=1 | 27         | 39122     | 1            | 0.08  |

**eIF4BIP\_B8**

| prot_acc | prot_desc                                                                                          | prot_score | prot_mass | prot_matches | emPAI |
|----------|----------------------------------------------------------------------------------------------------|------------|-----------|--------------|-------|
| B4DEW9   | Eukaryotic translation initiation factor 3 subunit F OS=Homo sapiens GN=EIF3F PE=2 SV=1            | 197        | 23152     | 7            | 1.17  |
| H3BRV0   | Eukaryotic translation initiation factor 3 subunit C OS=Homo sapiens GN=EIF3C PE=2 SV=1            | 151        | 104036    | 7            | 0.16  |
| B4DS13   | Eukaryotic translation initiation factor 4B OS=Homo sapiens GN=EIF4B PE=2 SV=1                     | 129        | 64767     | 8            | 0.33  |
| B4DXX7   | ATP-dependent RNA helicase DDX3Y OS=Homo sapiens GN=DDX3Y PE=2 SV=1                                | 125        | 72886     | 3            | 0.13  |
| P55884   | Eukaryotic translation initiation factor 3 subunit B OS=Homo sapiens GN=EIF3B PE=1 SV=3            | 118        | 92424     | 6            | 0.18  |
| B0QYA3   | Eukaryotic translation initiation factor 3 subunit D (Fragment) OS=Homo sapiens GN=EIF3D PE=2 SV=1 | 100        | 19769     | 1            | 0.16  |
| Q14152   | Eukaryotic translation initiation factor 3 subunit A OS=Homo sapiens GN=EIF3A PE=1 SV=1            | 86         | 166468    | 9            | 0.04  |
| H3BNC1   | RNA-binding motif protein, X chromosome, N-terminally processed OS=Homo sapiens GN=RBMX PE=2       | 65         | 4008      | 1            | 0.9   |
| H7C211   | Protein arginine N-methyltransferase 1 OS=Homo sapiens GN=PRMT1 PE=2 SV=1                          | 61         | 42434     | 2            | 0.07  |
| E9PFG1   | Probable ubiquitin carboxyl-terminal hydrolase FAF-X OS=Homo sapiens GN=USP9X PE=2 SV=1            | 60         | 116177    | 2            | 0.05  |
| K7EL20   | Eukaryotic translation initiation factor 3 subunit G (Fragment) OS=Homo sapiens GN=EIF3G PE=3 SV=1 | 60         | 29362     | 2            | 0.11  |
| B0QY89   | Eukaryotic translation initiation factor 3 subunit L OS=Homo sapiens GN=EIF3L PE=2 SV=1            | 52         | 70857     | 3            | 0.04  |
| Q7L2H7   | Eukaryotic translation initiation factor 3 subunit M OS=Homo sapiens GN=EIF3M PE=1 SV=1            | 49         | 42476     | 3            | 0.15  |
| Q9Y310   | tRNA-splicing ligase RtcB homolog OS=Homo sapiens GN=C22orf28 PE=1 SV=1                            | 48         | 55175     | 1            | 0.06  |
| H0YBR5   | Eukaryotic translation initiation factor 3 subunit E (Fragment) OS=Homo sapiens GN=EIF3E PE=4 SV=1 | 47         | 20244     | 1            | 0.16  |
| Q96JT2   | Solute carrier family 45 member 3 OS=Homo sapiens GN=SLC45A3 PE=2 SV=1                             | 34         | 59284     | 1            | 0.05  |

**eIF4BIP\_B9**

| prot_acc | prot_desc                                                                               | prot_score | prot_mass | prot_matches | emPAI |
|----------|-----------------------------------------------------------------------------------------|------------|-----------|--------------|-------|
| Q7L2H7   | Eukaryotic translation initiation factor 3 subunit M OS=Homo sapiens GN=EIF3M PE=1 SV=1 | 235        | 42476     | 8            | 0.77  |
| O15372   | Eukaryotic translation initiation factor 3 subunit H OS=Homo sapiens GN=EIF3H PE=1 SV=1 | 167        | 39905     | 10           | 0.58  |
| B0QY89   | Eukaryotic translation initiation factor 3 subunit L OS=Homo sapiens GN=EIF3L PE=2 SV=1 | 129        | 70857     | 11           | 0.35  |
| E7EX17   | Eukaryotic translation initiation factor 4B OS=Homo sapiens GN=EIF4B PE=2 SV=1          | 117        | 69657     | 9            | 0.36  |
| P60228   | Eukaryotic translation initiation factor 3 subunit E OS=Homo sapiens GN=EIF3E PE=1 SV=1 | 112        | 52187     | 8            | 0.34  |
| P55884   | Eukaryotic translation initiation factor 3 subunit B OS=Homo sapiens GN=EIF3B PE=1 SV=3 | 104        | 92424     | 4            | 0.14  |

|          |                                                                                                    |     |        |   |      |
|----------|----------------------------------------------------------------------------------------------------|-----|--------|---|------|
| H7C2I1   | Protein arginine N-methyltransferase 1 OS=Homo sapiens GN=PRMT1 PE=2 SV=1                          | 100 | 42434  | 4 | 0.33 |
| B0QYA3   | Eukaryotic translation initiation factor 3 subunit D (Fragment) OS=Homo sapiens GN=EIF3D PE=2 SV=1 | 86  | 19769  | 1 | 0.16 |
| H3BRV0   | Eukaryotic translation initiation factor 3 subunit C OS=Homo sapiens GN=EIF3C PE=2 SV=1            | 83  | 104036 | 5 | 0.09 |
| F5H335   | Eukaryotic translation initiation factor 3 subunit A OS=Homo sapiens GN=EIF3A PE=2 SV=1            | 74  | 162537 | 2 | 0.04 |
| A6NE09   | Protein RPSAP58 OS=Homo sapiens GN=RPSAP58 PE=2 SV=1                                               | 68  | 32888  | 2 | 0.1  |
| Q8IXT5   | RNA-binding protein 12B OS=Homo sapiens GN=RBM12B PE=1 SV=2                                        | 39  | 118030 | 1 | 0.03 |
| Q93008-1 | Isoform 2 of Probable ubiquitin carboxyl-terminal hydrolase FAF-X OS=Homo sapiens GN=USP9X         | 37  | 290278 | 2 | 0.01 |
| O00507   | Probable ubiquitin carboxyl-terminal hydrolase FAF-Y OS=Homo sapiens GN=USP9Y PE=1 SV=2            | 37  | 290891 | 2 | 0.01 |
| E9PI65   | Heat shock cognate 71 kDa protein (Fragment) OS=Homo sapiens GN=HSPA8 PE=2 SV=1                    | 35  | 17905  | 1 | 0.18 |

#### EIF4BIP\_B10

| prot_acc | prot_desc                                                                                | prot_score | prot_mass | prot_matches | empAI |
|----------|------------------------------------------------------------------------------------------|------------|-----------|--------------|-------|
| H3BRV0   | Eukaryotic translation initiation factor 3 subunit C OS=Homo sapiens GN=EIF3C PE=2 SV=1  | 338        | 104036    | 10           | 0.3   |
| P55884   | Eukaryotic translation initiation factor 3 subunit B OS=Homo sapiens GN=EIF3B PE=1 SV=3  | 186        | 92424     | 7            | 0.22  |
| Q7L2H7   | Eukaryotic translation initiation factor 3 subunit M OS=Homo sapiens GN=EIF3M PE=1 SV=1  | 153        | 42476     | 5            | 0.43  |
| E5RGA2   | Eukaryotic translation initiation factor 3 subunit E OS=Homo sapiens GN=EIF3E PE=2 SV=1  | 153        | 41331     | 11           | 0.67  |
| E7EX17   | Eukaryotic translation initiation factor 4B OS=Homo sapiens GN=EIF4B PE=2 SV=1           | 120        | 69657     | 11           | 0.55  |
| H0YA55   | Serum albumin (Fragment) OS=Homo sapiens GN=ALB PE=4 SV=1                                | 106        | 51537     | 5            | 0.19  |
| Q13347   | Eukaryotic translation initiation factor 3 subunit I OS=Homo sapiens GN=EIF3I PE=1 SV=1  | 101        | 36479     | 5            | 0.51  |
| Q93008   | Probable ubiquitin carboxyl-terminal hydrolase FAF-X OS=Homo sapiens GN=USP9X PE=1 SV=3  | 70         | 292094    | 1            | 0.01  |
| O00507   | Probable ubiquitin carboxyl-terminal hydrolase FAF-Y OS=Homo sapiens GN=USP9Y PE=1 SV=2  | 59         | 290891    | 1            | 0.01  |
| B3KS98   | Eukaryotic translation initiation factor 3 subunit H OS=Homo sapiens GN=EIF3S3 PE=2 SV=1 | 58         | 41555     | 2            | 0.08  |
| B0QY89   | Eukaryotic translation initiation factor 3 subunit L OS=Homo sapiens GN=EIF3L PE=2 SV=1  | 46         | 70857     | 2            | 0.04  |
| B4DVY1   | Eukaryotic translation initiation factor 3 subunit D OS=Homo sapiens GN=EIF3D PE=2 SV=1  | 44         | 58104     | 1            | 0.05  |
| D6RC30   | Transmembrane protein 232 (Fragment) OS=Homo sapiens GN=TMEM232 PE=2 SV=1                | 43         | 28664     | 1            | 0.11  |

#### EIF4BIP\_B11

| prot_acc | prot_desc                                                                                          | prot_score | prot_mass | prot_matches | empAI |
|----------|----------------------------------------------------------------------------------------------------|------------|-----------|--------------|-------|
| E7EX17   | Eukaryotic translation initiation factor 4B OS=Homo sapiens GN=EIF4B PE=2 SV=1                     | 251        | 69657     | 14           | 0.69  |
| H3BRV0   | Eukaryotic translation initiation factor 3 subunit C OS=Homo sapiens GN=EIF3C PE=2 SV=1            | 227        | 104036    | 9            | 0.3   |
| O00303   | Eukaryotic translation initiation factor 3 subunit F OS=Homo sapiens GN=EIF3F PE=1 SV=1            | 202        | 37540     | 6            | 0.62  |
| B0QY89   | Eukaryotic translation initiation factor 3 subunit L OS=Homo sapiens GN=EIF3L PE=2 SV=1            | 174        | 70857     | 9            | 0.3   |
| P55884   | Eukaryotic translation initiation factor 3 subunit B OS=Homo sapiens GN=EIF3B PE=1 SV=3            | 159        | 92424     | 8            | 0.26  |
| Q13347   | Eukaryotic translation initiation factor 3 subunit I OS=Homo sapiens GN=EIF3I PE=1 SV=1            | 127        | 36479     | 7            | 0.79  |
| E9PI65   | Heat shock cognate 71 kDa protein (Fragment) OS=Homo sapiens GN=HSPA8 PE=2 SV=1                    | 126        | 17905     | 2            | 0.39  |
| Q7L2H7   | Eukaryotic translation initiation factor 3 subunit M OS=Homo sapiens GN=EIF3M PE=1 SV=1            | 111        | 42476     | 4            | 0.24  |
| E5RGA2   | Eukaryotic translation initiation factor 3 subunit E OS=Homo sapiens GN=EIF3E PE=2 SV=1            | 109        | 41331     | 5            | 0.34  |
| B0QYA3   | Eukaryotic translation initiation factor 3 subunit D (Fragment) OS=Homo sapiens GN=EIF3D PE=2 SV=1 | 89         | 19769     | 2            | 0.35  |
| Q93008-1 | Isoform 2 of Probable ubiquitin carboxyl-terminal hydrolase FAF-X OS=Homo sapiens GN=USP9X         | 68         | 290278    | 2            | 0.02  |
| B1ALC0   | Actin-related protein 2/3 complex subunit 5 OS=Homo sapiens GN=ARPC5 PE=2 SV=1                     | 60         | 14798     | 1            | 0.22  |
| H0YH80   | Heterogeneous nuclear ribonucleoprotein A1 (Fragment) OS=Homo sapiens GN=HNRNPA1 PE=2 SV=          | 48         | 19460     | 1            | 0.17  |
| B4DUJ3   | Eukaryotic translation initiation factor 3 subunit J OS=Homo sapiens GN=EIF3J PE=2 SV=1            | 47         | 22927     | 2            | 0.14  |
| F5H335   | Eukaryotic translation initiation factor 3 subunit A OS=Homo sapiens GN=EIF3A PE=2 SV=1            | 41         | 162537    | 4            | 0.06  |
| A2A3R5   | 40S ribosomal protein S6 OS=Homo sapiens GN=RPS6 PE=2 SV=1                                         | 39         | 24953     | 1            | 0.13  |
| B7Z6M4   | BTB/POZ domain-containing adapter for CUL3-mediated RhoA degradation protein 2 OS=Homo sapien      | 33         | 24693     | 1            | 0.13  |
| Q8IXT5   | RNA-binding protein 12B OS=Homo sapiens GN=RBM12B PE=1 SV=2                                        | 31         | 118030    | 1            | 0.03  |
| K7EKL5   | DENN domain-containing protein 1C OS=Homo sapiens GN=DENND1C PE=4 SV=1                             | 21         | 23537     | 1            | 0.13  |

#### EIF4BIP\_B12

| prot_acc | prot_desc                                                                                          | prot_score | prot_mass | prot_matches | empAI |
|----------|----------------------------------------------------------------------------------------------------|------------|-----------|--------------|-------|
| E7EX17   | Eukaryotic translation initiation factor 4B OS=Homo sapiens GN=EIF4B PE=2 SV=1                     | 78         | 69657     | 6            | 0.14  |
| J3KN86   | 40S ribosomal protein S3 OS=Homo sapiens GN=RPS3 PE=3 SV=1                                         | 76         | 28468     | 5            | 0.37  |
| B0QYA3   | Eukaryotic translation initiation factor 3 subunit D (Fragment) OS=Homo sapiens GN=EIF3D PE=2 SV=1 | 68         | 19769     | 1            | 0.16  |

|        |                                                                                         |    |       |   |      |
|--------|-----------------------------------------------------------------------------------------|----|-------|---|------|
| P62753 | 40S ribosomal protein S6 OS=Homo sapiens GN=RPS6 PE=1 SV=1                              | 42 | 28663 | 2 | 0.11 |
| B3KSH1 | Eukaryotic translation initiation factor 3 subunit F OS=Homo sapiens GN=EIF3F PE=2 SV=1 | 38 | 39122 | 1 | 0.08 |
| D6RAT0 | 40S ribosomal protein S3a OS=Homo sapiens GN=RPS3A PE=2 SV=1                            | 32 | 25870 | 3 | 0.12 |

#### eIF4BIP\_B13

| prot_acc | prot_desc                                                                                          | prot_score | prot_mass | prot_matches | emPAI |
|----------|----------------------------------------------------------------------------------------------------|------------|-----------|--------------|-------|
| H3BRV0   | Eukaryotic translation initiation factor 3 subunit C OS=Homo sapiens GN=EIF3C PE=2 SV=1            | 201        | 104036    | 7            | 0.23  |
| Q5JR95   | 40S ribosomal protein S8 OS=Homo sapiens GN=RPS8 PE=2 SV=1                                         | 188        | 21866     | 6            | 0.98  |
| J3KN86   | 40S ribosomal protein S3 OS=Homo sapiens GN=RPS3 PE=3 SV=1                                         | 179        | 28468     | 5            | 0.7   |
| B4DS13   | Eukaryotic translation initiation factor 4B OS=Homo sapiens GN=EIF4B PE=2 SV=1                     | 165        | 64767     | 8            | 0.39  |
| P55884   | Eukaryotic translation initiation factor 3 subunit B OS=Homo sapiens GN=EIF3B PE=1 SV=3            | 139        | 92424     | 7            | 0.22  |
| P62701   | 40S ribosomal protein S4, X isoform OS=Homo sapiens GN=RPS4X PE=1 SV=2                             | 126        | 29579     | 7            | 0.67  |
| B0QYA3   | Eukaryotic translation initiation factor 3 subunit D (Fragment) OS=Homo sapiens GN=EIF3D PE=2 SV=1 | 106        | 19769     | 1            | 0.16  |
| B3KS98   | Eukaryotic translation initiation factor 3 subunit H OS=Homo sapiens GN=EIF3S3 PE=2 SV=1           | 105        | 41555     | 4            | 0.16  |
| B4DVY1   | Eukaryotic translation initiation factor 3 subunit D OS=Homo sapiens GN=EIF3D PE=2 SV=1            | 99         | 58104     | 2            | 0.11  |
| Q13347   | Eukaryotic translation initiation factor 3 subunit I OS=Homo sapiens GN=EIF3I PE=1 SV=1            | 76         | 36479     | 4            | 0.28  |
| E5RGA2   | Eukaryotic translation initiation factor 3 subunit E OS=Homo sapiens GN=EIF3E PE=2 SV=1            | 75         | 41331     | 3            | 0.25  |
| E9PI65   | Heat shock cognate 71 kDa protein (Fragment) OS=Homo sapiens GN=HSPA8 PE=2 SV=1                    | 62         | 17905     | 1            | 0.18  |
| A2A3R5   | 40S ribosomal protein S6 OS=Homo sapiens GN=RPS6 PE=2 SV=1                                         | 54         | 24953     | 1            | 0.13  |
| K7EP16   | Eukaryotic translation initiation factor 3 subunit G (Fragment) OS=Homo sapiens GN=EIF3G PE=4 SV=1 | 36         | 13204     | 1            | 0.25  |
| D6RG13   | 40S ribosomal protein S3a (Fragment) OS=Homo sapiens GN=RPS3A PE=2 SV=1                            | 35         | 25591     | 2            | 0.12  |
| B7Z6M4   | BTB/POZ domain-containing adapter for CUL3-mediated RhoA degradation protein 2 OS=Homo sapiens     | 33         | 24693     | 1            | 0.13  |
| B0QY89   | Eukaryotic translation initiation factor 3 subunit L OS=Homo sapiens GN=EIF3L PE=2 SV=1            | 32         | 70857     | 3            | 0.04  |

#### eIF4BIP\_B14

| prot_acc | prot_desc                                                                                      | prot_score | prot_mass | prot_matches | emPAI |
|----------|------------------------------------------------------------------------------------------------|------------|-----------|--------------|-------|
| Q5JR95   | 40S ribosomal protein S8 OS=Homo sapiens GN=RPS8 PE=2 SV=1                                     | 202        | 21866     | 6            | 0.51  |
| E7EX17   | Eukaryotic translation initiation factor 4B OS=Homo sapiens GN=EIF4B PE=2 SV=1                 | 186        | 69657     | 15           | 0.55  |
| Q13347   | Eukaryotic translation initiation factor 3 subunit I OS=Homo sapiens GN=EIF3I PE=1 SV=1        | 184        | 36479     | 8            | 0.79  |
| B4DEW9   | Eukaryotic translation initiation factor 3 subunit F OS=Homo sapiens GN=EIF3F PE=2 SV=1        | 172        | 23152     | 6            | 1.17  |
| P55884   | Eukaryotic translation initiation factor 3 subunit B OS=Homo sapiens GN=EIF3B PE=1 SV=3        | 165        | 92424     | 8            | 0.3   |
| H3BRV0   | Eukaryotic translation initiation factor 3 subunit C OS=Homo sapiens GN=EIF3C PE=2 SV=1        | 142        | 104036    | 4            | 0.13  |
| B3KS98   | Eukaryotic translation initiation factor 3 subunit H OS=Homo sapiens GN=EIF3S3 PE=2 SV=1       | 120        | 41555     | 6            | 0.25  |
| B0QY89   | Eukaryotic translation initiation factor 3 subunit L OS=Homo sapiens GN=EIF3L PE=2 SV=1        | 101        | 70857     | 4            | 0.14  |
| O75821   | Eukaryotic translation initiation factor 3 subunit G OS=Homo sapiens GN=EIF3G PE=1 SV=2        | 99         | 35589     | 4            | 0.29  |
| Q7L2H7   | Eukaryotic translation initiation factor 3 subunit M OS=Homo sapiens GN=EIF3M PE=1 SV=1        | 97         | 42476     | 3            | 0.15  |
| P08107   | Heat shock 70 kDa protein 1A/1B OS=Homo sapiens GN=HSPA1A PE=1 SV=5                            | 91         | 70009     | 2            | 0.09  |
| E5RGA2   | Eukaryotic translation initiation factor 3 subunit E OS=Homo sapiens GN=EIF3E PE=2 SV=1        | 89         | 41331     | 3            | 0.16  |
| E9PFG1   | Probable ubiquitin carboxyl-terminal hydrolase FAF-X OS=Homo sapiens GN=USP9X PE=2 SV=1        | 89         | 116177    | 1            | 0.03  |
| E9PI65   | Heat shock cognate 71 kDa protein (Fragment) OS=Homo sapiens GN=HSPA8 PE=2 SV=1                | 78         | 17905     | 2            | 0.39  |
| P62701   | 40S ribosomal protein S4, X isoform OS=Homo sapiens GN=RPS4X PE=1 SV=2                         | 73         | 29579     | 1            | 0.11  |
| H0YCJ7   | 40S ribosomal protein S3 (Fragment) OS=Homo sapiens GN=RPS3 PE=2 SV=1                          | 67         | 14994     | 1            | 0.22  |
| J3QLE5   | Small nuclear ribonucleoprotein-associated protein N (Fragment) OS=Homo sapiens GN=SNRPN PE=4  | 59         | 17535     | 3            | 0.4   |
| Q9Y224   | UPF0568 protein C14orf166 OS=Homo sapiens GN=C14orf166 PE=1 SV=1                               | 59         | 28051     | 2            | 0.24  |
| B4DUI3   | Eukaryotic translation initiation factor 3 subunit J OS=Homo sapiens GN=EIF3J PE=2 SV=1        | 59         | 22927     | 1            | 0.14  |
| H0YIB4   | Serine/arginine-rich-splicing factor 9 (Fragment) OS=Homo sapiens GN=SRSF9 PE=4 SV=1           | 51         | 12830     | 1            | 0.25  |
| J3KSL8   | Trafficking protein particle complex subunit 8 OS=Homo sapiens GN=TRAPPC8 PE=4 SV=1            | 45         | 104179    | 1            | 0.03  |
| A2A3R5   | 40S ribosomal protein S6 OS=Homo sapiens GN=RPS6 PE=2 SV=1                                     | 35         | 24953     | 1            | 0.13  |
| B7Z6M4   | BTB/POZ domain-containing adapter for CUL3-mediated RhoA degradation protein 2 OS=Homo sapiens | 34         | 24693     | 1            | 0.13  |
| E7EPB3   | 60S ribosomal protein L14 OS=Homo sapiens GN=RPL14 PE=2 SV=1                                   | 33         | 14549     | 1            | 0.22  |

#### eIF4BIP\_B15

| prot_acc | prot_desc | prot_score | prot_mass | prot_matches | emPAI |
|----------|-----------|------------|-----------|--------------|-------|
|----------|-----------|------------|-----------|--------------|-------|

|        |                                                                                                    |     |       |    |      |
|--------|----------------------------------------------------------------------------------------------------|-----|-------|----|------|
| B4DEW9 | Eukaryotic translation initiation factor 3 subunit F OS=Homo sapiens GN=EIF3F PE=2 SV=1            | 168 | 23152 | 6  | 1.17 |
| P46781 | 40S ribosomal protein S9 OS=Homo sapiens GN=RPS9 PE=1 SV=3                                         | 138 | 22578 | 10 | 1.53 |
| Q13347 | Eukaryotic translation initiation factor 3 subunit I OS=Homo sapiens GN=EIF3I PE=1 SV=1            | 103 | 36479 | 5  | 0.51 |
| B4DS13 | Eukaryotic translation initiation factor 4B OS=Homo sapiens GN=EIF4B PE=2 SV=1                     | 103 | 64767 | 7  | 0.27 |
| B7ZAM9 | Eukaryotic translation initiation factor 3 subunit K OS=Homo sapiens GN=EIF3K PE=2 SV=1            | 96  | 24468 | 2  | 0.28 |
| H3BPE4 | Eukaryotic translation initiation factor 3 subunit C (Fragment) OS=Homo sapiens GN=EIF3C PE=2 SV=1 | 95  | 17047 | 2  | 0.41 |
| Q7L2H7 | Eukaryotic translation initiation factor 3 subunit M OS=Homo sapiens GN=EIF3M PE=1 SV=1            | 91  | 42476 | 3  | 0.24 |
| O75821 | Eukaryotic translation initiation factor 3 subunit G OS=Homo sapiens GN=EIF3G PE=1 SV=2            | 75  | 35589 | 2  | 0.19 |
| P55884 | Eukaryotic translation initiation factor 3 subunit B OS=Homo sapiens GN=EIF3B PE=1 SV=3            | 67  | 92424 | 2  | 0.03 |
| Q5JR95 | 40S ribosomal protein S8 OS=Homo sapiens GN=RPS8 PE=2 SV=1                                         | 66  | 21866 | 1  | 0.15 |
| H0Y9R4 | 60S ribosomal protein L9 (Fragment) OS=Homo sapiens GN=RPL9 PE=4 SV=1                              | 59  | 10150 | 1  | 0.33 |
| P62701 | 40S ribosomal protein S4, X isoform OS=Homo sapiens GN=RPS4X PE=1 SV=2                             | 59  | 29579 | 2  | 0.11 |
| H0YCJ7 | 40S ribosomal protein S3 (Fragment) OS=Homo sapiens GN=RPS3 PE=2 SV=1                              | 56  | 14994 | 1  | 0.22 |
| J3QLR8 | 28S ribosomal protein S23, mitochondrial OS=Homo sapiens GN=MRPS23 PE=4 SV=1                       | 53  | 17506 | 1  | 0.18 |
| E9PI65 | Heat shock cognate 71 kDa protein (Fragment) OS=Homo sapiens GN=HSPA8 PE=2 SV=1                    | 49  | 17905 | 1  | 0.18 |
| J3QLE5 | Small nuclear ribonucleoprotein-associated protein N (Fragment) OS=Homo sapiens GN=SNRPN PE=4      | 47  | 17535 | 1  | 0.18 |
| B1ALC0 | Actin-related protein 2/3 complex subunit 5 OS=Homo sapiens GN=ARPC5 PE=2 SV=1                     | 46  | 14798 | 1  | 0.22 |
| P62081 | 40S ribosomal protein S7 OS=Homo sapiens GN=RPS7 PE=1 SV=1                                         | 41  | 22113 | 3  | 0.31 |
| H0YHA7 | 60S ribosomal protein L18 (Fragment) OS=Homo sapiens GN=RPL18 PE=3 SV=1                            | 36  | 18962 | 1  | 0.17 |
| M0QZN2 | 40S ribosomal protein S5 OS=Homo sapiens GN=RPS5 PE=4 SV=1                                         | 34  | 14754 | 1  | 0.22 |
| H0YBR5 | Eukaryotic translation initiation factor 3 subunit E (Fragment) OS=Homo sapiens GN=EIF3E PE=4 SV=1 | 30  | 20244 | 1  | 0.16 |

#### eIF4BIP\_B16

| prot_acc | prot_desc                                                                                          | prot_score | prot_mass | prot_matches | emPAI |
|----------|----------------------------------------------------------------------------------------------------|------------|-----------|--------------|-------|
| H0YCJ7   | 40S ribosomal protein S3 (Fragment) OS=Homo sapiens GN=RPS3 PE=2 SV=1                              | 161        | 14994     | 6            | 2.24  |
| P55884   | Eukaryotic translation initiation factor 3 subunit B OS=Homo sapiens GN=EIF3B PE=1 SV=3            | 153        | 92424     | 7            | 0.14  |
| H3BRV0   | Eukaryotic translation initiation factor 3 subunit C OS=Homo sapiens GN=EIF3C PE=2 SV=1            | 149        | 104036    | 4            | 0.13  |
| C9JNW5   | 60S ribosomal protein L24 OS=Homo sapiens GN=RPL24 PE=2 SV=1                                       | 138        | 17532     | 4            | 0.66  |
| P46783   | 40S ribosomal protein S10 OS=Homo sapiens GN=RPS10 PE=1 SV=1                                       | 133        | 18886     | 2            | 0.37  |
| M0QZC5   | 40S ribosomal protein S11 OS=Homo sapiens GN=RPS11 PE=4 SV=1                                       | 123        | 13989     | 6            | 1.31  |
| P46781   | 40S ribosomal protein S9 OS=Homo sapiens GN=RPS9 PE=1 SV=3                                         | 115        | 22578     | 6            | 0.7   |
| B0QYA3   | Eukaryotic translation initiation factor 3 subunit D (Fragment) OS=Homo sapiens GN=EIF3D PE=2 SV=1 | 110        | 19769     | 2            | 0.35  |
| E7EX17   | Eukaryotic translation initiation factor 4B OS=Homo sapiens GN=EIF4B PE=2 SV=1                     | 110        | 69657     | 7            | 0.19  |
| H0YDT6   | Eukaryotic translation initiation factor 3 subunit F (Fragment) OS=Homo sapiens GN=EIF3F PE=2 SV=1 | 105        | 10801     | 1            | 0.31  |
| Q7L2H7   | Eukaryotic translation initiation factor 3 subunit M OS=Homo sapiens GN=EIF3M PE=1 SV=1            | 103        | 42476     | 5            | 0.43  |
| O75821   | Eukaryotic translation initiation factor 3 subunit G OS=Homo sapiens GN=EIF3G PE=1 SV=2            | 88         | 35589     | 5            | 0.29  |
| K7EMA7   | 60S ribosomal protein L23a OS=Homo sapiens GN=RPL23A PE=3 SV=1                                     | 85         | 7918      | 1            | 0.43  |
| B0QY89   | Eukaryotic translation initiation factor 3 subunit L OS=Homo sapiens GN=EIF3L PE=2 SV=1            | 77         | 70857     | 4            | 0.14  |
| Q5JR95   | 40S ribosomal protein S8 OS=Homo sapiens GN=RPS8 PE=2 SV=1                                         | 76         | 21866     | 2            | 0.31  |
| E9PI65   | Heat shock cognate 71 kDa protein (Fragment) OS=Homo sapiens GN=HSPA8 PE=2 SV=1                    | 73         | 17905     | 1            | 0.18  |
| E5RGA2   | Eukaryotic translation initiation factor 3 subunit E OS=Homo sapiens GN=EIF3E PE=2 SV=1            | 72         | 41331     | 3            | 0.25  |
| B3KS98   | Eukaryotic translation initiation factor 3 subunit H OS=Homo sapiens GN=EIF3S3 PE=2 SV=1           | 71         | 41555     | 1            | 0.08  |
| B7ZAM9   | Eukaryotic translation initiation factor 3 subunit K OS=Homo sapiens GN=EIF3K PE=2 SV=1            | 70         | 24468     | 1            | 0.13  |
| P62701   | 40S ribosomal protein S4, X isoform OS=Homo sapiens GN=RPS4X PE=1 SV=2                             | 67         | 29579     | 1            | 0.11  |
| D6RAF8   | Heterogeneous nuclear ribonucleoprotein D0 (Fragment) OS=Homo sapiens GN=HNRNPD PE=2 SV=1          | 59         | 23062     | 1            | 0.14  |
| A2A3R5   | 40S ribosomal protein S6 OS=Homo sapiens GN=RPS6 PE=2 SV=1                                         | 51         | 24953     | 1            | 0.13  |
| M0QX76   | 40S ribosomal protein S16 (Fragment) OS=Homo sapiens GN=RPS16 PE=4 SV=1                            | 46         | 5554      | 1            | 0.62  |
| B4E241   | Serine/arginine-rich-splicing factor 3 OS=Homo sapiens GN=SFRS3 PE=2 SV=1                          | 39         | 14194     | 1            | 0.23  |
| Q14152   | Eukaryotic translation initiation factor 3 subunit A OS=Homo sapiens GN=EIF3A PE=1 SV=1            | 34         | 166468    | 1            | 0.02  |
| H0Y8L7   | 40S ribosomal protein S3a (Fragment) OS=Homo sapiens GN=RPS3A PE=2 SV=1                            | 34         | 22123     | 1            | 0.14  |
| B5MCP9   | 40S ribosomal protein S7 OS=Homo sapiens GN=RPS7 PE=2 SV=1                                         | 33         | 21299     | 1            | 0.15  |

#### eIF4BIP\_B17



| prot_acc | prot_desc                                                                                          | prot_score | prot_mass | prot_matches | emPAI |
|----------|----------------------------------------------------------------------------------------------------|------------|-----------|--------------|-------|
| B0QY89   | Eukaryotic translation initiation factor 3 subunit L OS=Homo sapiens GN=EIF3L PE=2 SV=1            | 175        | 70857     | 6            | 0.24  |
| P62269   | 40S ribosomal protein S18 OS=Homo sapiens GN=RPS18 PE=1 SV=3                                       | 161        | 17708     | 7            | 1.72  |
| P62851   | 40S ribosomal protein S25 OS=Homo sapiens GN=RPS25 PE=1 SV=1                                       | 136        | 13734     | 4            | 1.34  |
| H0YCJ7   | 40S ribosomal protein S3 (Fragment) OS=Homo sapiens GN=RPS3 PE=2 SV=1                              | 131        | 14994     | 6            | 1.66  |
| P46783   | 40S ribosomal protein S10 OS=Homo sapiens GN=RPS10 PE=1 SV=1                                       | 124        | 18886     | 2            | 0.37  |
| M0R210   | 40S ribosomal protein S16 OS=Homo sapiens GN=RPS16 PE=4 SV=1                                       | 111        | 14410     | 4            | 1.25  |
| P62854   | 40S ribosomal protein S26 OS=Homo sapiens GN=RPS26 PE=1 SV=3                                       | 110        | 13007     | 2            | 0.57  |
| P62263   | 40S ribosomal protein S14 OS=Homo sapiens GN=RPS14 PE=1 SV=3                                       | 100        | 16263     | 3            | 0.72  |
| P55884   | Eukaryotic translation initiation factor 3 subunit B OS=Homo sapiens GN=EIF3B PE=1 SV=3            | 99         | 92424     | 2            | 0.07  |
| P62266   | 40S ribosomal protein S23 OS=Homo sapiens GN=RPS23 PE=1 SV=3                                       | 93         | 15798     | 1            | 0.21  |
| Q7L2H7   | Eukaryotic translation initiation factor 3 subunit M OS=Homo sapiens GN=EIF3M PE=1 SV=1            | 90         | 42476     | 3            | 0.24  |
| P62277   | 40S ribosomal protein S13 OS=Homo sapiens GN=RPS13 PE=1 SV=2                                       | 88         | 17212     | 3            | 0.41  |
| P39019   | 40S ribosomal protein S19 OS=Homo sapiens GN=RPS19 PE=1 SV=2                                       | 86         | 16051     | 5            | 1.08  |
| E7ETK0   | 40S ribosomal protein S24 OS=Homo sapiens GN=RPS24 PE=2 SV=1                                       | 85         | 15187     | 1            | 0.21  |
| P46781   | 40S ribosomal protein S9 OS=Homo sapiens GN=RPS9 PE=1 SV=3                                         | 85         | 22578     | 4            | 0.49  |
| A6NH36   | 40S ribosomal protein S4, X isoform OS=Homo sapiens GN=RPS4X PE=2 SV=1                             | 85         | 14011     | 3            | 0.87  |
| B4DS13   | Eukaryotic translation initiation factor 4B OS=Homo sapiens GN=EIF4B PE=2 SV=1                     | 83         | 64767     | 4            | 0.15  |
| B4DJP7   | Small nuclear ribonucleoprotein Sm D3 OS=Homo sapiens GN=SNRPD3 PE=2 SV=1                          | 81         | 13283     | 2            | 0.24  |
| O00571   | ATP-dependent RNA helicase DDX3X OS=Homo sapiens GN=DDX3X PE=1 SV=3                                | 71         | 73198     | 1            | 0.04  |
| K7EJT5   | 60S ribosomal protein L22 (Fragment) OS=Homo sapiens GN=RPL22 PE=4 SV=1                            | 70         | 5080      | 1            | 0.68  |
| Q5JR95   | 40S ribosomal protein S8 OS=Homo sapiens GN=RPS8 PE=2 SV=1                                         | 69         | 21866     | 1            | 0.15  |
| B7ZAM9   | Eukaryotic translation initiation factor 3 subunit K OS=Homo sapiens GN=EIF3K PE=2 SV=1            | 67         | 24468     | 1            | 0.13  |
| I3L3P7   | 40S ribosomal protein S15a OS=Homo sapiens GN=RPS15A PE=2 SV=1                                     | 64         | 11470     | 3            | 0.29  |
| P60866   | 40S ribosomal protein S20 OS=Homo sapiens GN=RPS20 PE=1 SV=1                                       | 61         | 13364     | 2            | 0.55  |
| Q13347   | Eukaryotic translation initiation factor 3 subunit I OS=Homo sapiens GN=EIF3I PE=1 SV=1            | 58         | 36479     | 1            | 0.09  |
| K7EL20   | Eukaryotic translation initiation factor 3 subunit G (Fragment) OS=Homo sapiens GN=EIF3G PE=3 SV=1 | 56         | 29362     | 2            | 0.11  |
| M0QZC5   | 40S ribosomal protein S11 OS=Homo sapiens GN=RPS11 PE=4 SV=1                                       | 55         | 13989     | 2            | 0.23  |
| B7Z4C8   | 60S ribosomal protein L31 OS=Homo sapiens GN=RPL31 PE=2 SV=1                                       | 54         | 15109     | 1            | 0.21  |
| H0YAW4   | Eukaryotic translation initiation factor 3 subunit E (Fragment) OS=Homo sapiens GN=EIF3E PE=4 SV=1 | 50         | 18135     | 2            | 0.18  |
| H3BPE4   | Eukaryotic translation initiation factor 3 subunit C (Fragment) OS=Homo sapiens GN=EIF3C PE=2 SV=1 | 49         | 17047     | 1            | 0.19  |
| A2A3R5   | 40S ribosomal protein S6 OS=Homo sapiens GN=RPS6 PE=2 SV=1                                         | 48         | 24953     | 1            | 0.13  |
| H0YK46   | 40S ribosomal protein S17 (Fragment) OS=Homo sapiens GN=RPS17 PE=2 SV=1                            | 47         | 21629     | 2            | 0.15  |
| P25398   | 40S ribosomal protein S12 OS=Homo sapiens GN=RPS12 PE=1 SV=3                                       | 38         | 14505     | 1            | 0.22  |
| J3QLI9   | Small nuclear ribonucleoprotein Sm D1 OS=Homo sapiens GN=SNRPD1 PE=4 SV=1                          | 36         | 8388      | 1            | 0.4   |
| H0YI13   | Bromodomain adjacent to zinc finger domain protein 2A (Fragment) OS=Homo sapiens GN=BAZ2A PE=      | 25         | 24138     | 1            | 0.13  |
